# Supplementary material for: Mo2C-embedded biomass-derived honeycomb-like nitrogen-doped carbon nanosheet/graphene aerogel films for highly efficient electrocatalytic hydrogen evolution
Source: Royal Society of Chemistry journal article supplement (doi:10.1039/c9nj05220h), 2019-12-18
Supplement: c9nj05220h1.pdf [file c9nj05220h1.pdf]

Electronic Supplementary Material (ESI) for New Journal of Chemistry.

## Supporting Information

Mo<sub>2</sub>C-embedded biomass-derived honeycomb-like nitrogen-doped carbon nanosheet/graphene aerogel films for highly efficient electrocatalytic hydrogen evolution

Bo Wang,<sup>\*a</sup> Xiaoyu Wu,<sup>b</sup> Xiaoyu Zhang,<sup>a</sup> GuiGui Pang,<sup>a</sup> and Songmei Li<sup>\*b</sup>

<sup>a</sup> Department of Environmental and Chemical Engineering, Tangshan University,  
Tangshan 063000, P. R. China.

<sup>b</sup> Key Laboratory of Aerospace Advanced Materials and Performance of Ministry of Education, School of Materials Science and Engineering, Beihang University, Beijing, 100191, P. R. China

\* Corresponding author. Tel: +86-315-2010649; Fax: +86-315-2010649.

E-mail address: wangbo@buaa.edu.cn.

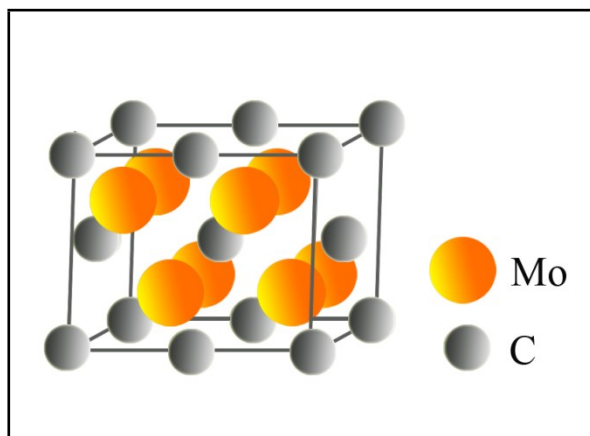

**Fig. S1** The crystal structure of hexagonal  $\text{Mo}_2\text{C}$ .

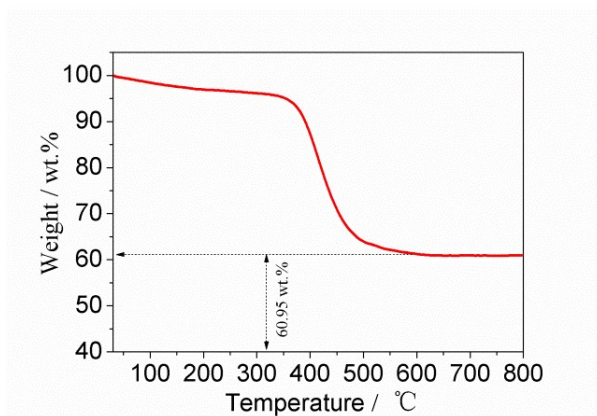

**Fig. S2** The TGA curves for  $\text{Mo}_2\text{C}@N\text{-DC/G-5}$  aerogel films..

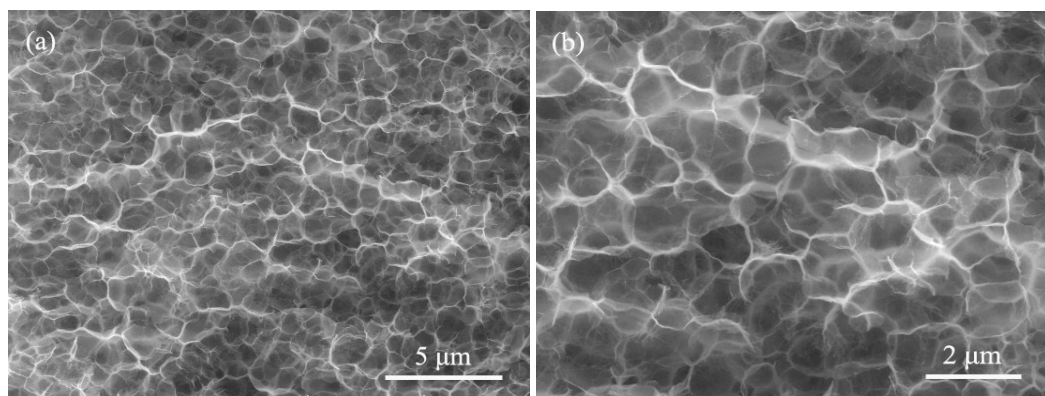

**Fig. S3** SEM images of cross-sections of the N-DC/G aerogel films at different magnifications..

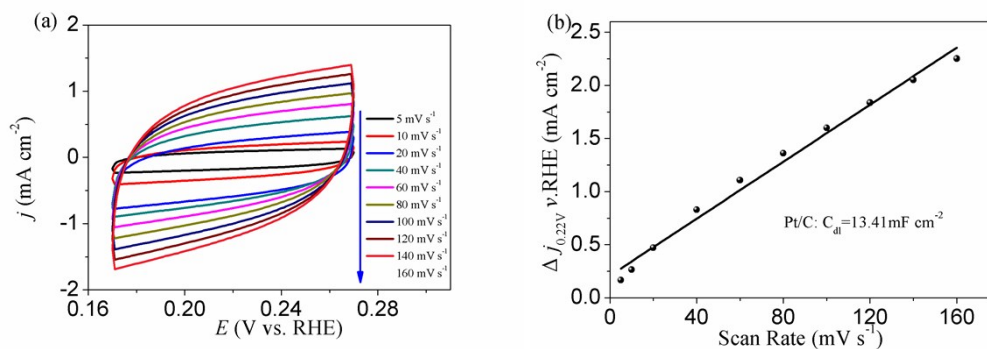

**Fig. S4** (c) Cyclic voltammograms curves of commercial Pt/C at different scan rates from 5 to 160  $\text{mV s}^{-1}$ , respectively. (d) The capacitive currents at 0.22 V vs. RHE as a function of scan rate for Pt/C. The  $C_{\text{dl}}$  of electrocatalysts were confirmed by the slope of the fitted line.

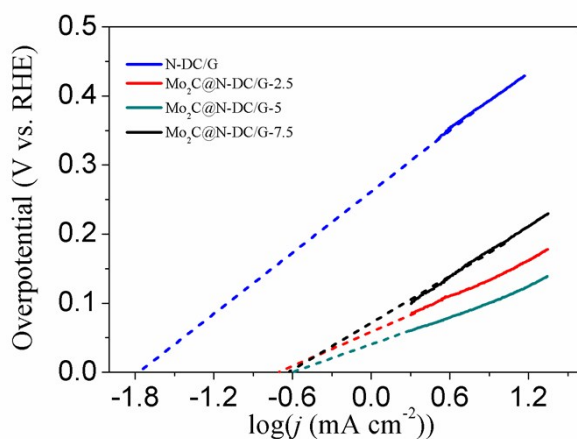

**Fig. S5** Calculated exchange current density for  $\text{Mo}_2\text{C}@N\text{-DC/G}$  in 0.5 M  $\text{H}_2\text{SO}_4$ .

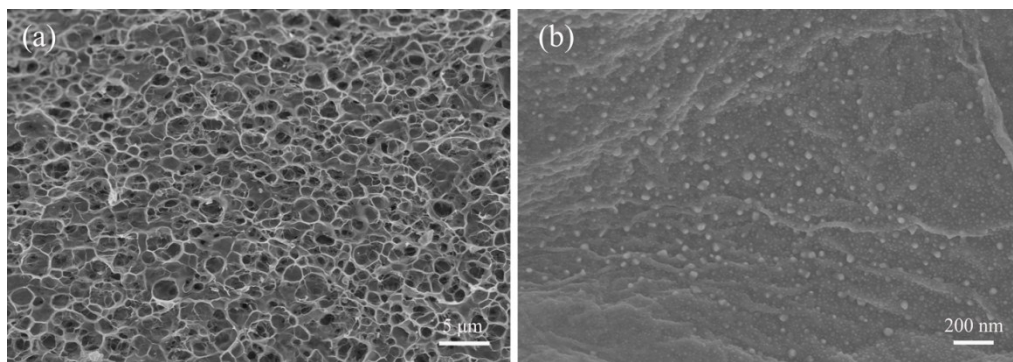

**Figure S6.** SEM images of  $\text{Mo}_2\text{C}@N\text{-DC/G-5}$  after being used for 15 h in HER for stability test in 0.5M  $\text{H}_2\text{SO}_4$ .
